# Supplementary material for: Hypoxia Preconditioned Serum (HPS) Promotes Osteoblast Proliferation, Migration and Matrix Deposition
Source: MDPI journal article supplement (doi:10.3390/biomedicines10071631), 2022-07-07
Supplement: s1 [file s1]

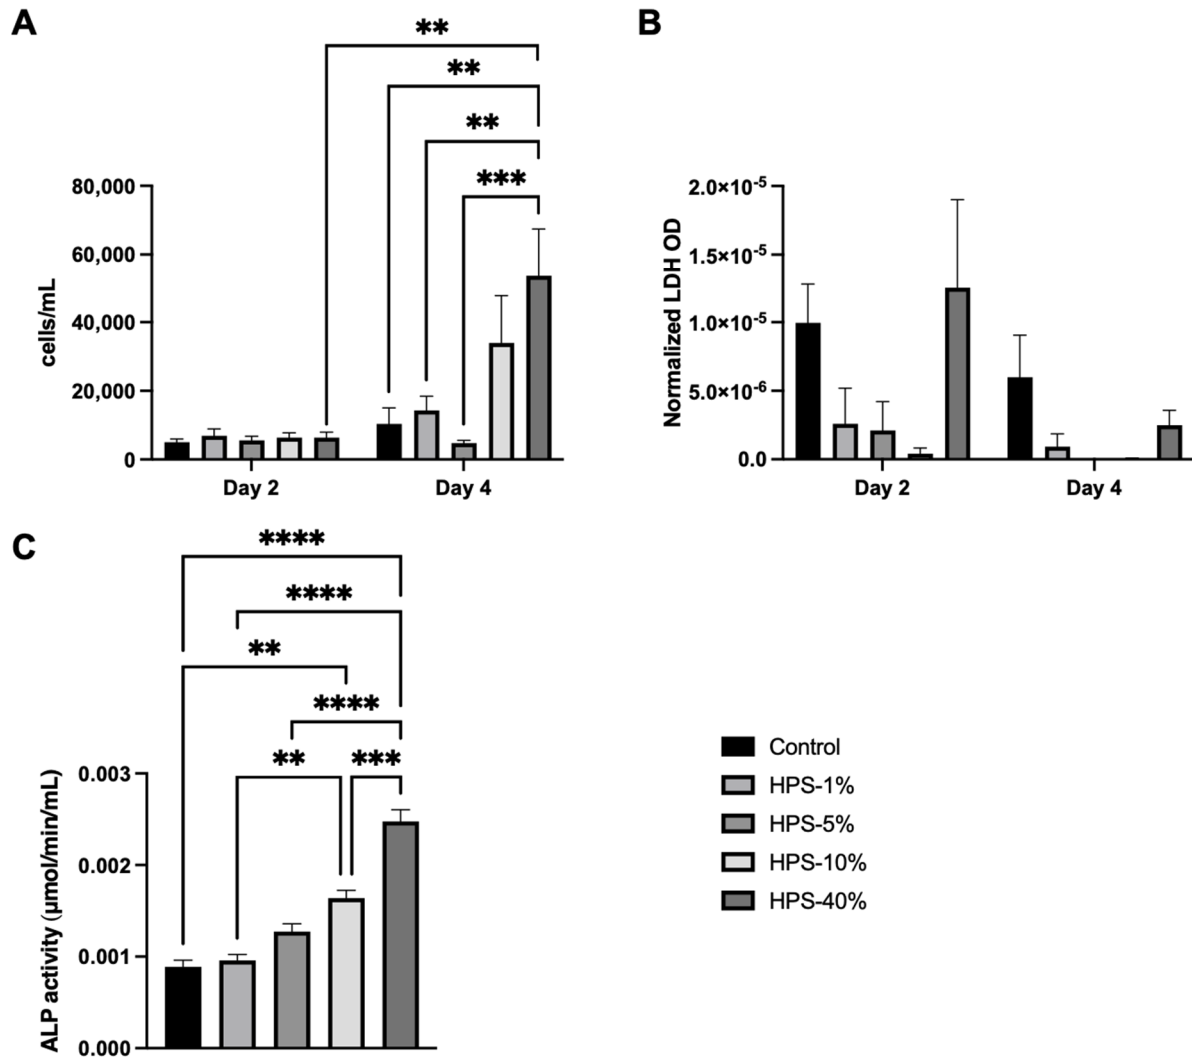

**Figure S1.** Analysis of osteoblast proliferation, LDH-cytotoxicity and ALP-activity in dependency of HPS-concentration. Osteoblasts seeded 5,000 per 24 well in HPS (diluted in culture media) in comparison to controls (culture media-only). **(A)** Cell counts of human osteoblasts on day 2 and day 4. **(B)** Lactate dehydrogenase (LDH) assay: optical density (OD) normalized per cell on day 2 and day 4. **(C)** Alkaline phosphatase (ALP) activity after 4 days of cultivation. (A)+(B): Two-way repeated-measures ANOVA with Tukey's multiple comparisons test. (C): One-way ANOVA with Tukey's multiple comparisons test. Data points are means  $\pm$  SEM,  $n=3$ .  $**p < 0.01$ ,  $***p < 0.001$ ,  $****p < 0.0001$ .
